# Supplementary material for: Performance of the quick Sequential (sepsis-related) Organ Failure Assessment score as a prognostic tool in infected patients outside the intensive care unit: a systematic review and meta-analysis
Source: PubMed Central journal article supplement (PMC5802050; doi:10.1186/s13054-018-1952-x), 2018-02-06

**Additional File 2. Summary for risk of bias of included studies and Risk of bias graph for the included studies**

|                             | <u>Risk of Bias</u> |            |                    |                 | <u>Applicability Concerns</u> |            |                    |
|-----------------------------|---------------------|------------|--------------------|-----------------|-------------------------------|------------|--------------------|
|                             | Patient Selection   | Index Test | Reference Standard | Flow and Timing | Patient Selection             | Index Test | Reference Standard |
| April 2017                  | +                   | +          | +                  | +               | +                             | +          | +                  |
| Askim 2017                  | +                   | +          | +                  | +               | +                             | +          | +                  |
| Chen 2016                   | +                   | +          | +                  | +               | +                             | +          | +                  |
| Churpek 2017                | +                   | +          | +                  | ?               | +                             | +          | +                  |
| Donnelly 2017               | +                   | +          | +                  | -               | +                             | +          | +                  |
| Dorsett 2017                | +                   | +          | +                  | -               | +                             | +          | +                  |
| Finkelsztein 2017           | +                   | +          | +                  | -               | +                             | +          | +                  |
| Forward 2017                | ?                   | ?          | +                  | -               | ?                             | ?          | +                  |
| Freund 2017                 | +                   | +          | +                  | +               | +                             | +          | +                  |
| Giamarellos-Bourboulis 2017 | +                   | +          | +                  | +               | +                             | +          | +                  |
| Henning 2017                | +                   | +          | +                  | +               | +                             | +          | +                  |
| Huson 2017                  | ?                   | +          | +                  | -               | ?                             | +          | +                  |
| Hwang 2017                  | +                   | +          | +                  | +               | +                             | +          | +                  |
| Kim 2017                    | +                   | +          | +                  | -               | +                             | +          | +                  |
| Kolditz 2017                | -                   | +          | +                  | -               | -                             | +          | +                  |
| Mellhammar 2017             | -                   | +          | +                  | -               | -                             | +          | +                  |
| Park 2017                   | +                   | +          | +                  | +               | +                             | +          | +                  |
| Peake 2017                  | -                   | +          | +                  | +               | -                             | +          | +                  |
| Quinten 2017                | +                   | +          | +                  | +               | +                             | +          | +                  |
| Ranzani 2017                | +                   | +          | +                  | +               | +                             | +          | +                  |
| Seymour 2016                | +                   | +          | +                  | +               | +                             | +          | +                  |
| Wang 2016                   | +                   | +          | +                  | -               | +                             | +          | +                  |
| Williams 2017               | +                   | +          | +                  | +               | +                             | +          | +                  |

  

|                                                                                          |                                                                                             |                                                                                         |
|------------------------------------------------------------------------------------------|---------------------------------------------------------------------------------------------|-----------------------------------------------------------------------------------------|
|  High |  Unclear |  Low |
|------------------------------------------------------------------------------------------|---------------------------------------------------------------------------------------------|-----------------------------------------------------------------------------------------|

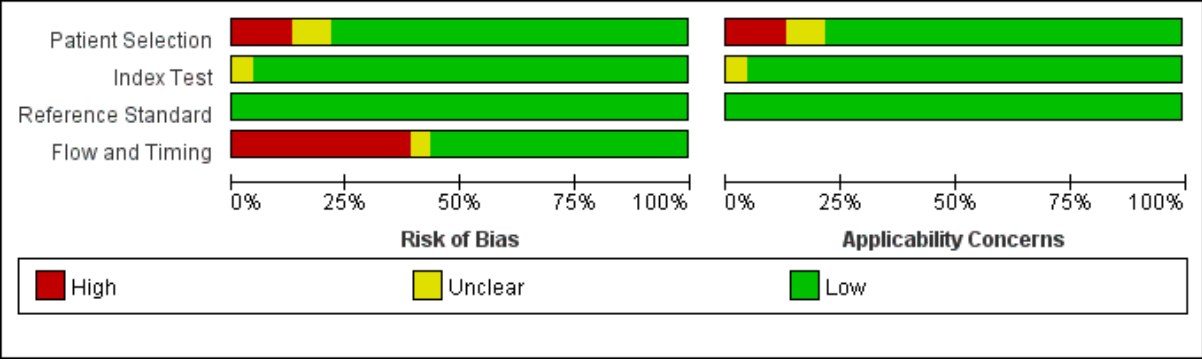

Supplement: 13054_2018_1952_MOESM2_ESM.pdf [file 13054_2018_1952_MOESM2_ESM.pdf]
