# Supplementary material for: Performance of the quick Sequential (sepsis-related) Organ Failure Assessment score as a prognostic tool in infected patients outside the intensive care unit: a systematic review and meta-analysis
Source: PubMed Central journal article supplement (PMC5802050; doi:10.1186/s13054-018-1952-x), 2018-02-06

**Additional File 3. Funnel plot for publication bias assessment of studies for (A) positive qSOFA score and (B) positive SIRS criteria score for the prediction of in-hospital mortality**

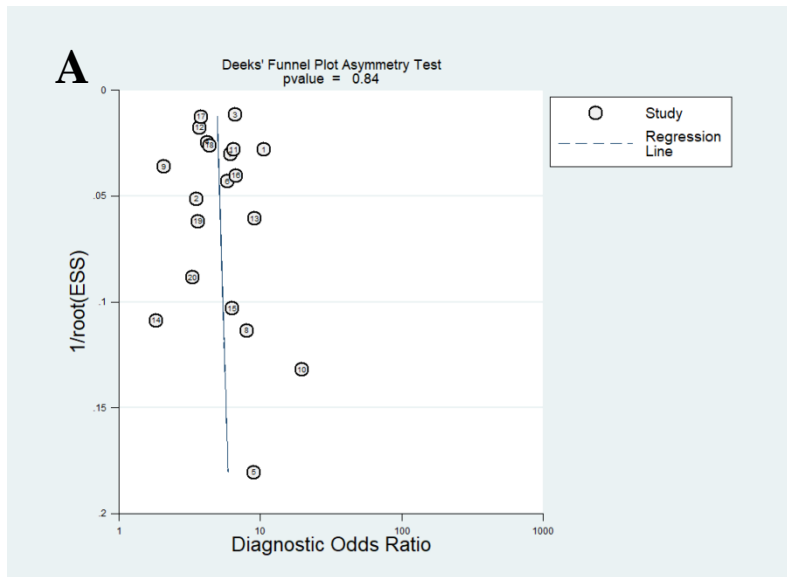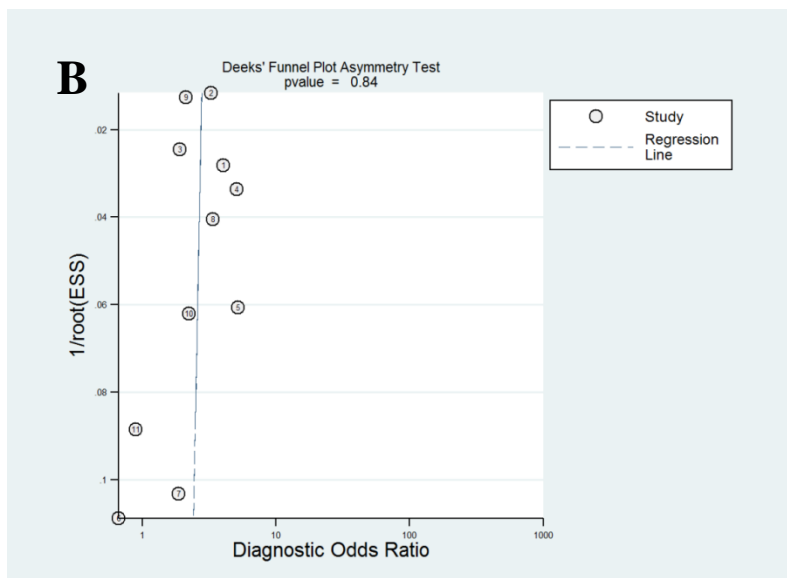

Supplement: 13054_2018_1952_MOESM3_ESM.pdf [file 13054_2018_1952_MOESM3_ESM.pdf]
