# Supplementary material for: Performance of the quick Sequential (sepsis-related) Organ Failure Assessment score as a prognostic tool in infected patients outside the intensive care unit: a systematic review and meta-analysis
Source: Springer Nature journal article supplement (doi:10.1186/s13054-018-1952-x), 2018-02-06

**Additional File 7. Paired forest plots of sensitivity and specificity of positive qSOFA score in identifying ICU admission in infected patients outside the intensive care unit**

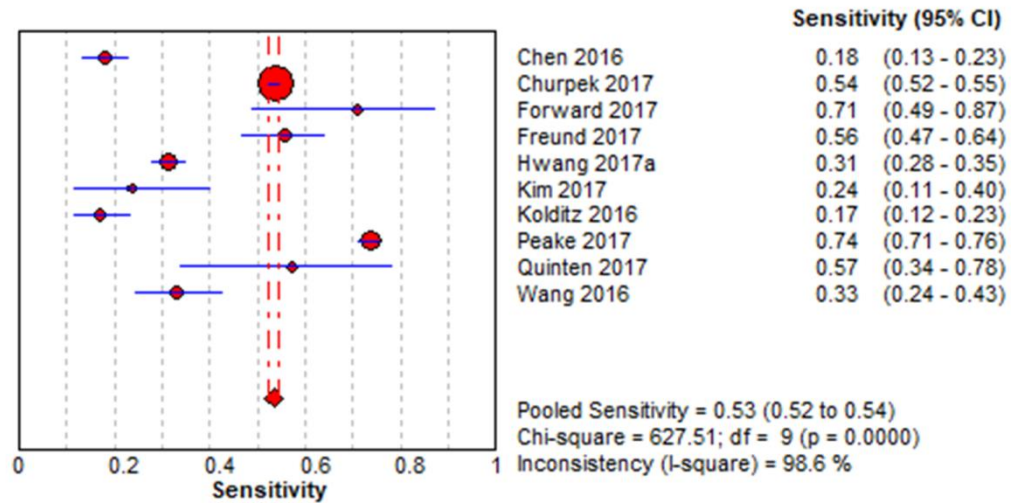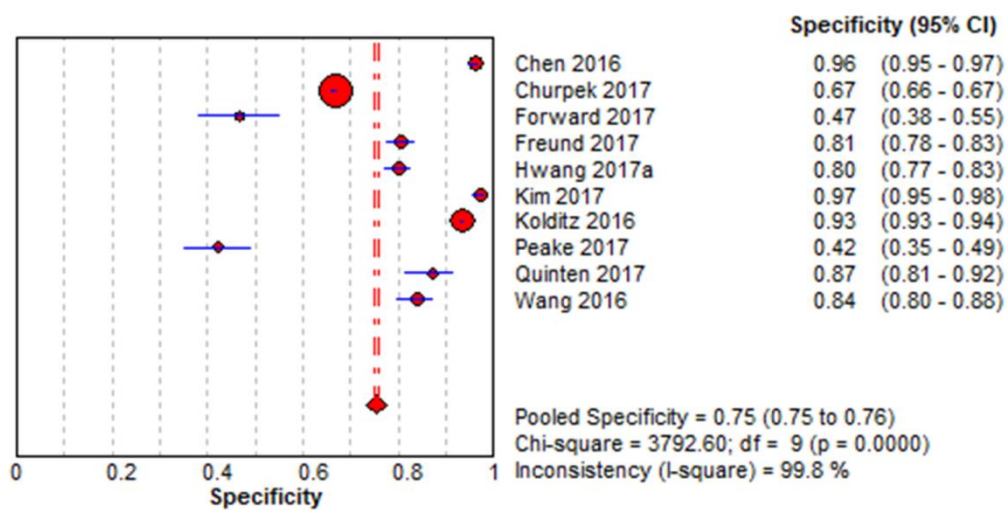

Supplement: MOESM7 [file 15443074]
